# Supplementary material for: Long-Term Impact of Cover Crop and Reduced Disturbance Tillage on Soil Pore Size and Soil Water Storage
Source: Copernicus journal article supplement (doi:10.5194/soil-2021-41), 2021-06-11
Supplement: Supplementary file [file soil-2021-41-AC1-supplement.pdf]

# Author Responses to Referee Comments

Soil-2021-41

---

We thank the editor and both anonymous referees for their valuable comments on our manuscript. In this document, we present our responses to the reviewer's comments. We copy-pasted the comments from both referees and wrote our responses beneath each paragraph. We have also numbered the specific referee comments consecutively prefixed with referee number (either 1 or 2).

Sincerely,

Samuel Araya on behalf of all co-authors.

---

## Response to Anonymous Referee #1

### General comments

This paper presents measurements of topsoil hydraulic properties made in four treatments of a long-term field experiment in California (with/without cover crops, conventional till/no-till) and uses these properties to simulate short-term soil water storage changes following subsurface drip irrigation.

The authors conclude that the no-till + cover crop system improves soil water storage (and presumably also the supply of water to the crop). However, this conclusion does not seem too well supported by the data as many of the differences between the treatments appear to be small. Many times in the paper, the authors report  $p$  values  $> 0.05$  as being statistically significant, which is not standard practice. I am speculating now, but I can imagine the authors may have been worried that negative results and conclusions would not be considered publishable. In fact, I think that this kind of publication bias may be quite common. If so, it would be unfortunate because it would mean that our consensus view on the efficacy of different management practices to improve soil health could be somewhat biased.

**We chose to use a less conservative p-value ( $p < 0.15$ ) as our standard in the significance tests to make note of differences that were more abundant in our research at that level. However, the point is well taken that such  $p > 0.1$  is not standard practice in the field. We have decided to address this concern by first placing a paragraph in the methods that explicitly communicates and highlights this. Furthermore, throughout the manuscript, we will briefly make this note where we reference these higher p-values.**

The small number of replicates (4) is an important limitation of this study. Forward modelling based on such limited replication, without the benefit of field monitoring data to calibrate and validate the model is very uncertain. These uncertainties are not discussed by the authors. Field measurements of soil water contents/potentials during and after irrigation would have helped to strengthen the study.

**We decided on 4 replicates for two reasons, (1) the time-consuming nature of the hydraulic property measurements, and (2) the relatively small variance observed among the replicates in relation to the treatments (for example, visual inspection of the retention and conductivity curves). However, to address the concerns of small replicate count, we will highlight the replicate count in the results and add a paragraph in the discussion section where we discuss the study's limitations.**

More details on the soil properties and the tillage practices implemented at the site are also needed (points 6-8 under “Specific comments”). The routines in the model related to root water uptake and soil evaporation also need to be better described (see points 10 and 11 under “Specific comments”)

**Thank you, we have responded to the comments in the specific comments section.**

The paper is generally well written and easy to read. There are a number of grammatical errors in addition to the ones noted below under “Technical corrections”, but these will be easy to correct.

**Thank you for taking the time to improve the paper. We will carefully address the technical comments you provided.**

### **Specific comments**

**1-1.** Line 18, and lines 20-22: these statements appear to be contradictory. First, the authors write that the differences in water storage are marginal, but then they conclude that NT and CC systems improve water retention at the field scale. This should be clarified.

**We will clarify the statement by explicitly stating that the practices show beneficial effects in terms of PSD changes and show marginal improvements in water storage. The abstract ending will read, “The study concludes that the long-term practices of NT and CC systems were beneficial in terms of changes to the PSD. NT and CC systems also made marginal improvements in soil water conductivity and water storage, improving water retention at the plot scale.”**

**1-2.** Line 44: The authors should write this in a less categorical way, by replacing “have been shown” to “may”, because it is definitely not always the case that reduced or no-till systems increase carbon sequestration in soil (see Meurer et al 2018). This is probably mostly because under some agro-environmental conditions, crop growth is poorer under no-till (Pittelkow et al., 2015), which reduces the carbon inputs to soil.

**We accept this comment and will re-write the entire paragraph to reflect the suggested points. The quoted sentence will now start as, “Several studies have shown, for example, that reduced disturbance tillage systems ..”.**

**1-3.** Lines 47-48: Yield certainly is sometimes compromised by no-till (see point 2 above, Pittelkow et al., 2015). Please re-phrase this to acknowledge this fact.

**We will replace “Without compromising yield and reducing cost.” with “while some studies show that reduced disturbance tillage reduce yield (Pittelkow et al., 2015) others have found that the yield is unaffected (Naab et al., 2017; Rasmussen, 1999; Alvarez and Steinbach, 2009)”**

**1-4.** Line 60: 900 mm annual rainfall?

**Change accepted.**

**1-5.** Lines 61-62: Perhaps you should explain why no-till can exacerbate compaction problems (because the soil is not loosened, but it is still trafficked) ... and also that this can impact yields negatively (Pittelkow et al., 2015)?

**We will update the second sentence as follows: “Without tillage to loosen the soil, reduced tillage systems can cause soil consolidation...”. We will also add the reference.**

**1-6.** Lines 78-79: it’s only a more descriptive term if no-till really was adopted at the site. This is not fully clear to me. At line 75, you write “reduced disturbance”. It’s important to be clear and explicit about the tillage

system. Is it “reduced tillage” or “no-till”? The tillage operations should be described in more detail for both ST and NT, giving information on the time of year, the implements used, and the depths to which they are operating.

**We believe that the term “no-tillage,” which relies on procedures that enable crop planting directly into the soil with no primary or secondary tillage since harvest of the previous crop (SSSA, 1996), most aptly characterizes this tillage system and is a better descriptor than alternatives such as “reduced,” “minimum,” or “conservation tillage” that have been used previously (Reicosky, 2015; Mitchell et al., 2019). We are aware of the confusing and vague language that is sometimes associated with tillage practices and the need for precision when reporting tillage systems in scientific work. Therefore we try to be clear with the language we use.**

**At line 75, we have replaced “reduced disturbance tillage” with “no-till”.**

**Regarding the detailed description of the systems, we decided to summarize the management practices and not include detailed management practices as this has been described in multiple previous publications. However, we agree that a more detailed summary is necessary. Following line 83 we will add the following summary. “Both the ST and the NT systems were previously described in detail (example, Veenstra et al., 2006; Mitchell et al., 2015). The NT systems were managed from the principle of reducing primary intercrop tillage to the greatest extent possible. Controlled traffic farming practices that restrict tractor traffic to certain furrows were used, and planting beds were not moved or destroyed in these systems during the entire study period. The only soil disturbance operations used in the NT systems were shallow cultivation during the first eight years of the project, since 2012. However, the only soil disturbance occurs at the time of seeding or transplanting. The ST systems consisted of multiple conventional intercrop tillage operations which break down and establish new beds following harvest and represent the normal operations of the San Joaquin Valley in terms of intensity, depth, and timing of tillage.”**

**Reicosky, E.C. 2015. Conservation tillage is not conservation agriculture. J. Soil water Conserv 70(5):103-107.**

**Mitchell, J.P., D.C. Reicosky, E.A. Kueneman, J. Fisher, and D. Beck. 2019. Conservation agriculture systems. CAB Reviews 14(001):1-25. <https://www.cabi.org/cabreviews/review/20193184383>**

**Mitchell, J.P., A. Shrestha, D.S. Munk, and K.J. Hembree. 2015. Cotton response to long-term no-tillage and cover cropping in the San Joaquin Valley. J. Cotton Science. 19:1-10.**

**Soil Science Society of America. 1996. Glossary of Soil Science Terms. Soil Science Society of America, Madison, WI.**

**Veenstra, Jessica J., William R. Horwath, and J.P. Mitchell. 2007. Tillage and cover cropping effects on aggregate-protected carbon in cotton and tomato. Soil Sci. Soc. Am. J. 71:362-371.**

**1-7.** Lines 81-83: it’s important to mention that the tractor traffic was controlled in this way, but what about harvesters? Presumably this kind of traffic was not controlled in the same way?

**All traffic was controlled in this manner, including harvesters. Please see the response to comment 1-6 above.**

1-8. Lines 84-87: The authors must give more information on the basic soil properties at the site: at the minimum, information is needed on the particle size distribution and organic carbon contents (the latter specified for each treatment, as they presumably differ after 20+ years).

**We will include descriptions of particle size distribution and organic carbon contents. We will also add a reference to previous studies that have a more detailed description of our site's soils.**

1-9. Lines 128-129: Why did you calculate unsaturated K at -10 kPa, and not say, at -33 kPa (field capacity)? You should also say how you did this: by fitting to the HYPROP data presumably?

**We will change “calculate” to “compared”. We will also describe that we read these values from the fitted hydraulic data.**

**We compared K at -10 kPa because in field conditions, soils rarely achieve 100 % saturation because of air entrapment and other factors. We assumed -10 kPa would be a better scale to represent field infiltration conditions.**

1-10. Line 174: What does “... a radius of maximum uptake intensity at 0 cm” mean? Not all readers will be familiar with this 3D water uptake model, so this should be explained better.

**We will re-write to clarify the variables as: “... using Vrugt et al. (2001) function. Values for the required variables are given in table 1”**

| <b>Variable</b>                           | <b>Value (cm)</b>    |
|-------------------------------------------|----------------------|
| <i>Maximum rooting depth</i>              | <i>35</i>            |
| <i>Maximum rooting radius</i>             | <i>15</i>            |
| <i>Depth of maximum uptake intensity</i>  | <i>10</i>            |
| <i>Radius of maximum uptake intensity</i> | <i>0 (at center)</i> |

1-11. Lines 175-182: this entire section is unclear to me. The authors mention evapotranspiration, but it's not clear how soil evaporation and transpiration are dealt with individually. For example, the name Feddes is mentioned on line 172, so I presume that the Feddes model is used to calculate actual transpiration from the potential uptake rate, but this should be explicitly stated. But how is soil evaporation reduced below the potential rate (which I presume is given by equation 4) when the soil surface dries out?

**The HYDRUS model only requires input of potential evapotranspiration. The model calculates actual evapotranspiration during simulation depending on the instantaneous soil moisture and root water uptake conditions.**

**We will clarify this section as follows: “The atmospheric boundary condition was defined by potential crop evapotranspiration (ETc) which was calculated from potential evapotranspiration (ETo) and a crop coefficient (Kc) (Equation 4).**

*Hourly ETo for a week in May 2018 (6-12 of May) was retrieved from the nearest weather station....”*

1-12. Line 227 and elsewhere in the paper: the authors refer to results with  $p$  values greater than 0.05 as “statistically significant” (or similar phrases). The authors should reserve such a description for results with  $p < 0.05$ . Instead, write “... a tendency for ...” or something similar.

**We will use similar phrases as suggested by the reviewer and indicate the actual p values wherever appropriate. However, we still believe that using  $p < 0.15$  as a cutoff for comparisons in the figures is useful and communicates the results clearly.**

**1-13.** Line 237: "... healthy organic matter cycling" is vague. This should be written more specifically.

**We will remove the word 'healthy', which we agree may not be as precise. We will re-write as follows: "...soil processes including soil organic matter cycling ..."**

**1-14.** Lines 246: Jarvis (2007) did not discuss these processes. It would be better to cite the recent review on soil structure dynamics by Meurer et al (2020) here instead.

**Thank you for suggesting a good reference. We will add Meurer et al. (2020) to the list of citations for this sentence. However, we believe Jarvis (2007) is also relevant that review paper also has relevant discussions and sources on the importance of plant roots in relation to soil structure.**

**1-15.** Figure 7. Is the y-axis on the Kunsat plot correct? 10 to the power of 0.004 is only 1.009. Isn't the variation in K larger than 1 to 1.009 cm/d?

**Upon further consideration based on this comment, we have decided that Figure 7b is not necessary and we will remove it from the manuscript. In the text, references to this figure, lines 274-277 will be replaced by, "There was almost no difference in  $K(100\text{ cm})$  among all treatments."**

## **Technical corrections**

**1-16.** Lines 45, 47 and 52: terms like "soil fertility" and "environmental quality" are rather vague. Please replace these with terms specific to what was measured in these studies you cite.

**We will go through the entire paragraph and replace those terms with the actual soil and environmental property mentioned in the references.**

**1-17.** Line 122: add "of water tensions" after "range"

**Comment accepted.**

**1-18.** Line 124: Write ... "We define field capacity ..." (this definition is only conventional in the U.S., not worldwide)

**Comment accepted.**

**1-19.** Line 125: delete the minus signs prior to 33 and 1500 (you refer to suction)

**Comment accepted.**

**1-20.** Lines 130-131: this can be deleted, as it is defined in connection to equation 1.

**We agree that it is defined in connection to the equation, however, we believe restating the terms again in this way is helpful and that this sentence remains in the manuscript.**

**1-21.** Line 163: delete "that of"

**Comment accepted.**

**1-22.** Line 165: "the van Genuchten-Mualem hydraulic model (van Genuchten, 1980)"

**Comment accepted.**

**1-23.** Line 171: add... "(S<sub>r</sub> in in equation 3)" after "root water uptake"

**Comment accepted.**

**1-24.** Line 175: insert "An .." before "... atmospheric .."

**Comment accepted.**

**1-25.** Lines 208-210: this sentence can be deleted (it's repeating the methods). The authors should refer to figure 4 here, but in a different way ... "Figure 4 shows one example of ..."

**We accept this comment. The paragraph will be re-written as, "An example of water conductivity and retention measurement for a single soil sample is shown in Figure 4."**

**1-26.** Line 227: Replace "A unique ..." by "One ..."

**Comment accepted.**

**1-27.** Lines 238-239: this is unclear. Is there text missing here?

**We will re-write the statement and correct the type to read, "ST-NO plots had the lowest relative abundance of larger macropores (50 – 1000 μm) while NT-CC had the highest proportion (Figure 5B)"**

**1-28.** Line 260: section 0?

**We will fix the typo to read, "section 3.1"**

**1-29.** Line 327: insert "of drainage" after "days"

**Comment accepted.**

**1-30.** Line 364: replace "steady-state" by "equilibrium"

**Comment accepted.**

## Responses to Anonymous Referee #2

The manuscripts explore the effect of long-term reduced tillage and cover crops on soil hydraulic properties. Based on laboratory samples from a long-term experiment, they derived the water retention curve (WRC) parameters and the  $K(h)$ . Using these observations, they simulate in Hydrus 2D, the effect of an irrigation event and analyze the dynamic of the water storage that follows.

The fact that the samples came from a long-term experiment with a sound statistical design is a strength of the research. The analysis of the observed hydraulic parameters is also statistically sound. The use of a simulation to access some more dynamic information on the soil profiles is interesting. While I find it less valuable than direct field observations, it remains based on laboratory measurements ( $K(h)$  and WRC). As such, it helps to assess the dynamics of water storage in the soil which is a valuable insight for the interpretation even if not confirmed by field measurements. The authors also discuss their results at the light of other works and seem well-informed of the work done in the area.

In general the manuscript is well written, the figures are clear and well-designed with good caption. The error bars are used to display uncertainty whenever possible. The abstract would gain to be a bit reworked so that the message and the findings of the work came through better. Also in several places, a bit more discussion is needed or further interpretation and hypothesis will deepen the discussion. Also, a discussion about the limitation of the modeling approach is needed.

**Thank you for the comments. We have made several improvements throughout the manuscript based on your specific comments. We will improve the abstract for readability and to better communicate the findings. We will also add a paragraph in the discussion section that highlights the study's limitations more clearly, including the limitations of the modeling approach and other limitations pointed out by Referee #1. Please find the many changes we made in response to your specific comments below.**

### General comments

The advantage of the simulation and its links with the observation doesn't come through easily as we read. It's difficult to see straight from the start why the simulations are needed and what they bring to the story. Maybe it can help to highlight, at the end of the introduction, the limitation of traditional PAW and field capacity to better highlight the need for simulation?

As mentioned by the authors, tillage can temporarily impact soil hydraulic parameters and soil properties. Potentially doesn't the growth of the (cover) crops also have an impact on WRC and  $K(h)$ ? Given the study provides topsoil and subsoil samples, can you discuss more the expected dynamics of soil hydraulic properties expected from each depth through the growing season? A more global discussion on the effect of the sampling depth would be great.

**Thank you for the suggestion. We will expand our discussion on this in our response to your specific comment (2-19) for example, we have expanded such discussion and added multiple references.**

The simulations bring insights into the dynamic water storage of the soil columns. However, I think it should be pointed out that these simulations are not backed up by observations of water content in the soil profile but only based on laboratory derived WRC and  $K(h)$ .

### Specific comments

**2-1.L14: "an improved structure" -> put it more explicitly: larger proportion of smaller pores?**

**We believe stating it in a more generalized way (“improved soil structure in terms of pore size distribution”) better summarizes our findings than the more detailed suggestion. Furthermore, the improvement of structure is due to larger proportion of smaller pores and the bi-modal nature of the distribution.**

2-2.L15: re-phrase more simply: "The conventional measurement of water content at field capacity (water content at -33 kPa suction) and the associated plant available water (PAW) showed that NT and CC plots had lower water content at field capacity and lower PAW compared to standard-till (ST) and plots without cover crop (NO)" -> "NT and CC plots had lower water content at field capacity (-33 kPa suction) and lower plant available water (PAW) compared to standard-till (ST) and plots without cover crop (NO)"

**We have accepted the recommendation as is.**

2-3.L18: "higher profile-level water storage"? -> what does 'profile-level' mean? maybe re-phrase more simply? (after reading the paper, I realized it was referring to the simulated provides but I didn't get it at first read, maybe drop 'profile-level'? You've already said it was in simulations)

**We will delete the word 'profile-level' as suggested.**

2-4.fig1: missing north arrow

**We will add a north arrow to Figure 1.**

2-5.L60: < 9000 mm annual rainfall is drier? -> 900 in original paper

**The typo will be corrected as suggested.**

2-6.L65: 'individual and interactive impact'? -> 'individual impact and its interaction

**Comment accepted.**

2-7.L74: please also give GPS coordinates

**We will include the geographic coordinates in parenthesis.**

2-8.L79: I though no-till was more absolute than reduced tillage. In reduced tillage, as you explain, there is a reduction of tillage operation, but no-till really means no-till no? If its a reduced tillage, maybe RT would be a better acronym. Also, what is the tillage depth? Does the reduced tillage involve a non-inversion tillage? What tools was used for the tillage (rotovator, harrow, chisel plow, moldboard plow) more explanation is needed here even if more details are published in Mitchell et al. previous papers.

**We believe that the term “no-tillage,” which relies on procedures that enable crop planting directly into the soil with no primary or secondary tillage since harvest of the previous crop (SSSA, 1996), most aptly characterizes this tillage system and is a better descriptor than alternatives such as “reduced,” “minimum,” or “conservation tillage” that have been used previously (Reicosky, 2015; Mitchell et al., 2019). We are aware of the confusing and vague language that is sometimes associated with tillage practices and the need for precision when reporting tillage systems in scientific work. Therefore we try to be clear with the language we use.**

**Regarding the detailed description of the systems, we decided to summarize the management practices and not include detailed management practices as this has been described in multiple previous publications. However, we agree that a more detailed summary is necessary. Following line 83 we will add the following summary that addresses the points**



**raised in your comment.** *“Both the ST and the NT systems were previously described in detail (example, Veenstra et al., 2006; Mitchell et al., 2015). The NT systems were managed from the principle of reducing primary intercrop tillage to the greatest extent possible. Controlled traffic farming practices that restrict tractor traffic to certain furrows were used and planting beds were not moved or destroyed in these systems during the entire study period. The only soil disturbance operations used in the NT systems were shallow cultivation during the first eight years of the project, since 2012, however, the only soil disturbance occurs at the time of seeding or transplanting. The ST systems consisted of multiple conventional intercrop tillage operations which break down and establish new beds following harvest and represent the normal operations of the San Joaquin Valley in terms of intensity, depth, and timing of tillage.”*

**Reicosky, E.C. 2015. Conservation tillage is not conservation agriculture. J. Soil water Conserv 70(5):103-107.**

**Mitchell, J.P., D.C. Reicosky, E.A. Kueneman, J. Fisher, and D. Beck. 2019. Conservation agriculture systems. CAB Reviews 14(001):1-25. <https://www.cabi.org/cabreviews/review/20193184383>**

**Mitchell, J.P., A. Shrestha, D.S. Munk, and K.J. Hembree. 2015. Cotton response to long-term no-tillage and cover cropping in the San Joaquin Valley. J. Cotton Science. 19:1-10.**

**Soil Science Society of America. 1996. Glossary of Soil Science Terms. Soil Science Society of America, Madison, WI.**

**Veenstra, Jessica J., William R. Horwath, and J.P. Mitchell. 2007. Tillage and cover cropping effects on aggregate-protected carbon in cotton and tomato. Soil Sci. Soc. Am. J. 71:362-371.**

**2-9.L97: “months after tillage” -> how many months about?**

**We will add the number of months (i.e., over 5-months).**

**2-10. fig2a: different colors of layers but no legend, also why a 3D schematic if the modeling is only in 2D, this is confusing, I would do a 2D schematic if only 2D modeling**

**We used a gradient of colors to highlight the soil layers used in the model. The colors serve only a cosmetic function.**

**We show a 3D schematic because the simulation domain was 3D axisymmetric cylinder. HYDRUS-2D is capable of performing simulations with this type of 3D domain.**

**2-11. fig2b: why no flux on the side? If it's in the field, it should be free flow, no? Unless you simulate your cylindrical lysimeter**

**The sides were set to no-flux as the radius of 18 cm is half the distance of the emitters spacing. Therefore, the midway between the drip lines is a flow divide, where flow lines from adjacent drippers meet. In other words, this boundary represents a symmetric condition that isolates the smallest representative hydrologic unit in the plot.**

**2-12. L188: why the spin-off has only 2.5 irrigation compared to the real simulation?**

**The spin-off period was instituted to make sure that the starting conditions of the different soils are closer to what they would be in nature. The selection of 2.5 cm irrigation was to create a condition that represents the differences of the soil structure but also results in a drier starting condition. This combination allows exploring a wider range of water dynamics**

without simulating multiple seasons. Note that the goal of these simulations was to compare the effect of the treatments on water conservation and water use efficiency, not necessarily to represent a particular field scenario.

- 2-13. L196: equivalent water depth (change?) -> not sure I understand this, is it the water in the entire profile or at a specific depth? what does the 'water depth' means?

**Equivalent water depth is the volume of irrigation water (cm<sup>3</sup>), divided by the area (cm<sup>2</sup>) to which this irrigation water is applied. This is the amount of water held in a profile in cm depth of water. We used water depth because it is a more conventional unit of measuring irrigation on farms and is a more convenient metric to compare with precipitation and ET.**

- 2-14. L205: seems sound. Do you also provide the .R file and the data as open-source attachment to the article?

**Yes. All the data and R code will be provided in a public repository.**

- 2-15. L238: 'all the treatments had higher relative... compared to ... had the highest proportion' -> re-phrase

**We will re-write the sentence for clarity as follows, "ST-NO plots had the lowest relative abundance of larger macropores (50 – 1000 μm) while NT-CC had the highest proportion (Figure 5B)."**

- 2-16. L260: 'discussed at section 0' -> 'section 3.1'?

**Comment accepted.**

- 2-17. fig7: why is NT-CC for Ks so much higher while there not such difference for K100cm? Discuss

**we have decided that Figure 7b is not necessary and we will remove it from the manuscript. In the text, references to this figure, lines 274-277, will be replaced by, "There was almost no difference in K(100 cm) among all treatments."**

- 2-18. L300: "Our results showed that while this was the case with ST, it was not the case for NT" -> do you have an explanation/hypothesis?

**We will add the following possible explanation after that statement, "This is possibly due to the relatively intact roots left after CC is removed, unlike the ST plots where the effect of CC roots is disturbed by tillage following the CC removal."**

- 2-19. L301: 'For the subsurface layer of NT treatments,  $\theta_{FC}$  was significantly lower for the NT-CC compared with NT-NO treatments.' -> could this be that the roots of the CC are reaching deeper down? what is your hypothesis? discuss more

**We agree with this comment. We will add the following discussion to clarify the point: "For the subsurface layer of NT treatments,  $\theta_{FC}$  was significantly lower for the NT-CC compared with NT-NO treatments. This difference suggests that roots from cover crops extend below our surface layer and have the potential to significantly alter soil structure. This subsurface effect of CC may be masked by frequent disturbance in the ST treatments. This observation is consistent with recent studies that have shown that the effect of cover crops extends below the so-called plough layer (rooting depth of approximately 30 cm) (Rath et al., 2021; Veloso et al., 2018; Sastre et al., 2018; Tautges et al., 2019)."**

2-20. fig10: are these curves for one single plot/simulation? or averaged over all 4 plots for each treatment?  
Make this clear in the caption.

**We will include a statement in the caption to explain that the lines are group averages.**

2-21. L344: "(P < 0.15)" -> lower p for p-value (typo)

**Comment accepted.**

2-22. fig11: could it be plotted the same way as figure 8 with both top and subsoil in the same subplot? that will make comparison easier

**We will update figure 11 to be similar to figure 8 in layout.**

2-23. figA4 and A5 shows the distribution for a set of 4 plots but you simulate 4\*4 in total right? are these plots average per treatment or just one pick among the 4 replicates? Make this clear in caption

**We will update the caption to indicate that the values are treatment averages.**
